# Supplementary material for: Genome-Wide Association Study Identified a Narrow Chromosome 1 Region Associated with Chicken Growth Traits
Source: PubMed Central journal article supplement (PMC3281030; doi:10.1371/journal.pone.0030910), 2012-02-16

5.69

**A**

Manhattan Plot: BW0

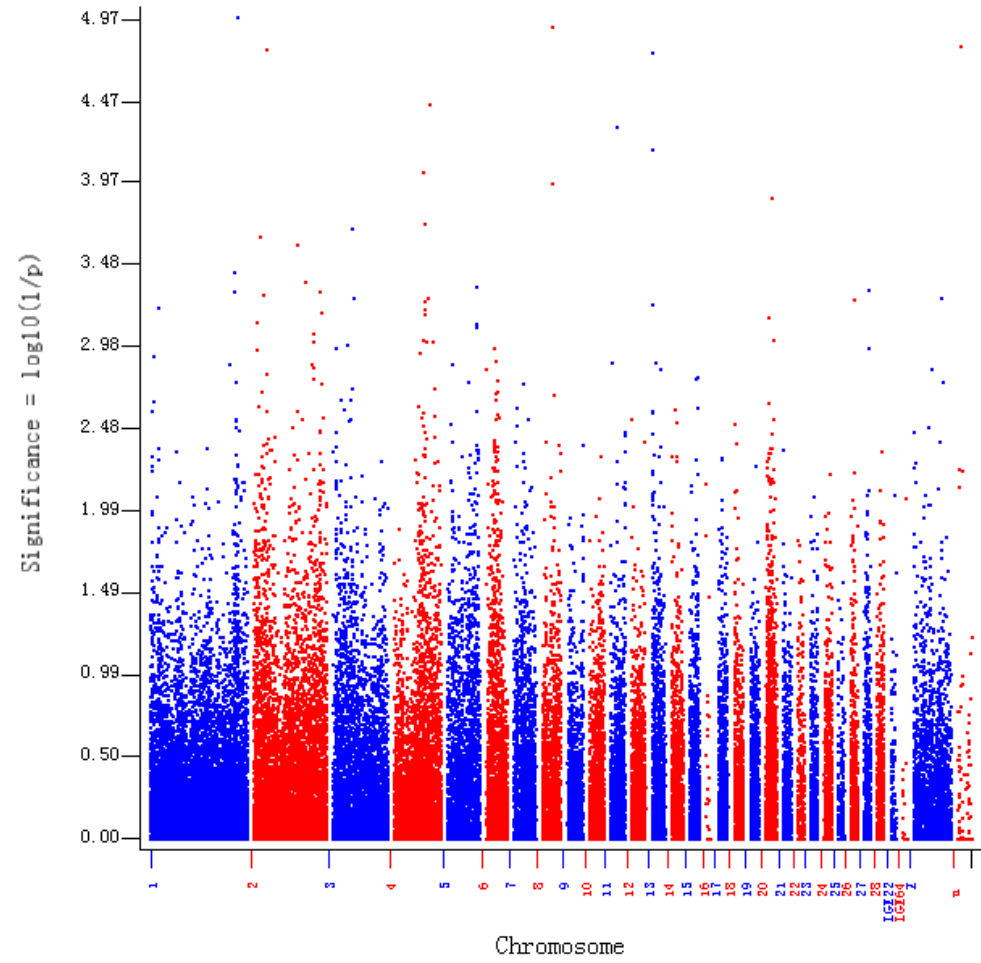

**B**

Manhattan Plot: BW7

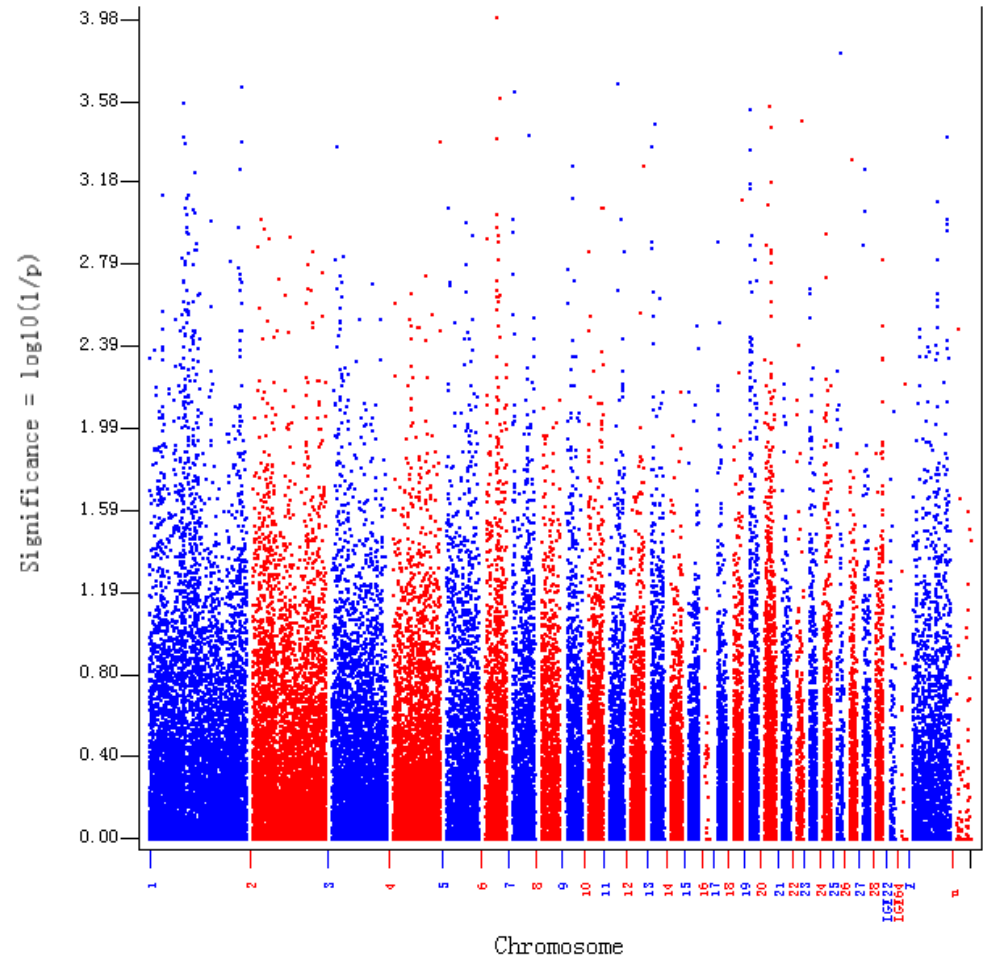

**C**

Manhattan Plot: BW14

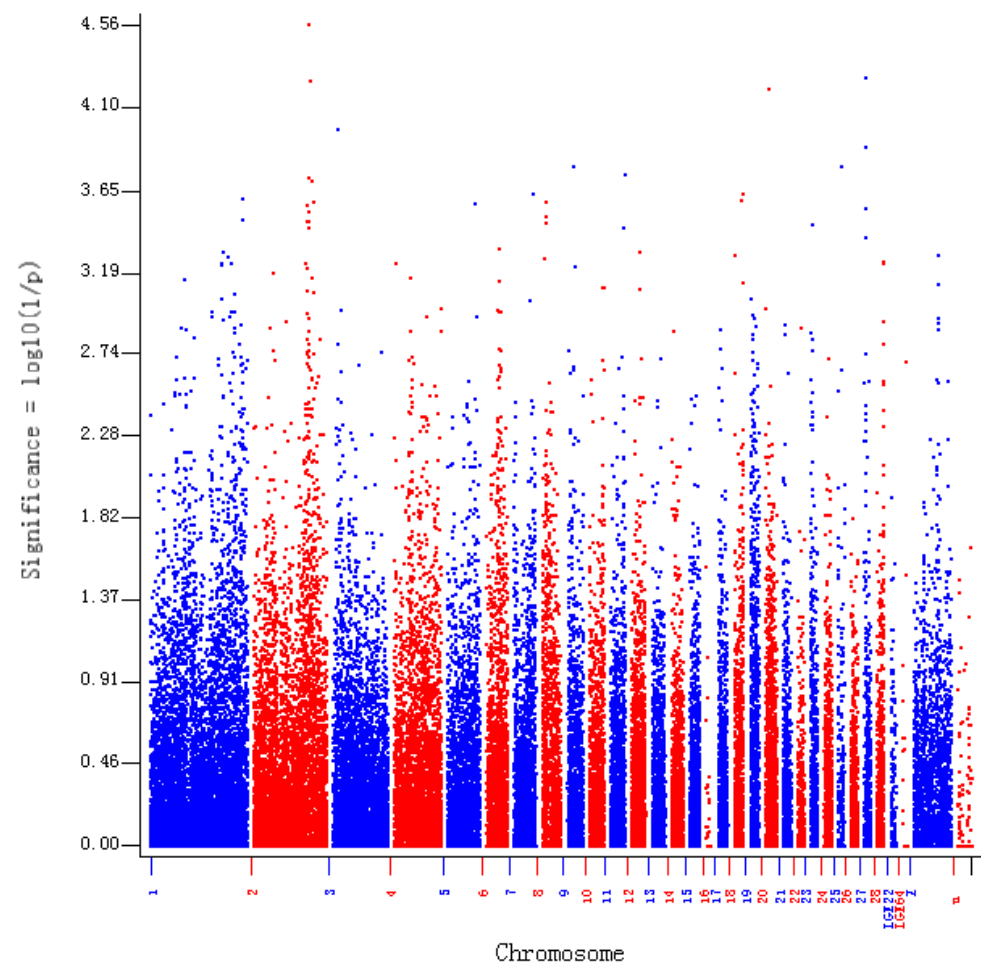**D**

Manhattan Plot: BW21

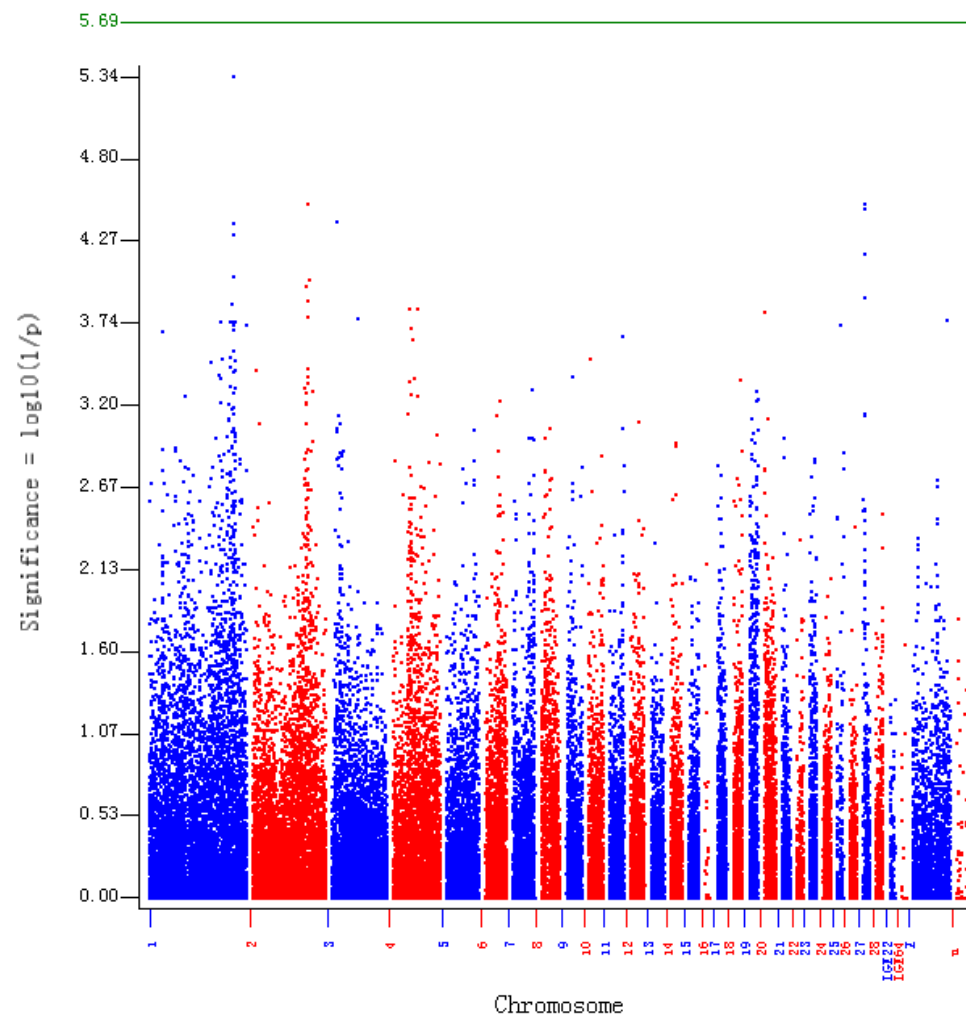

**E**

Manhattan Plot: BW28

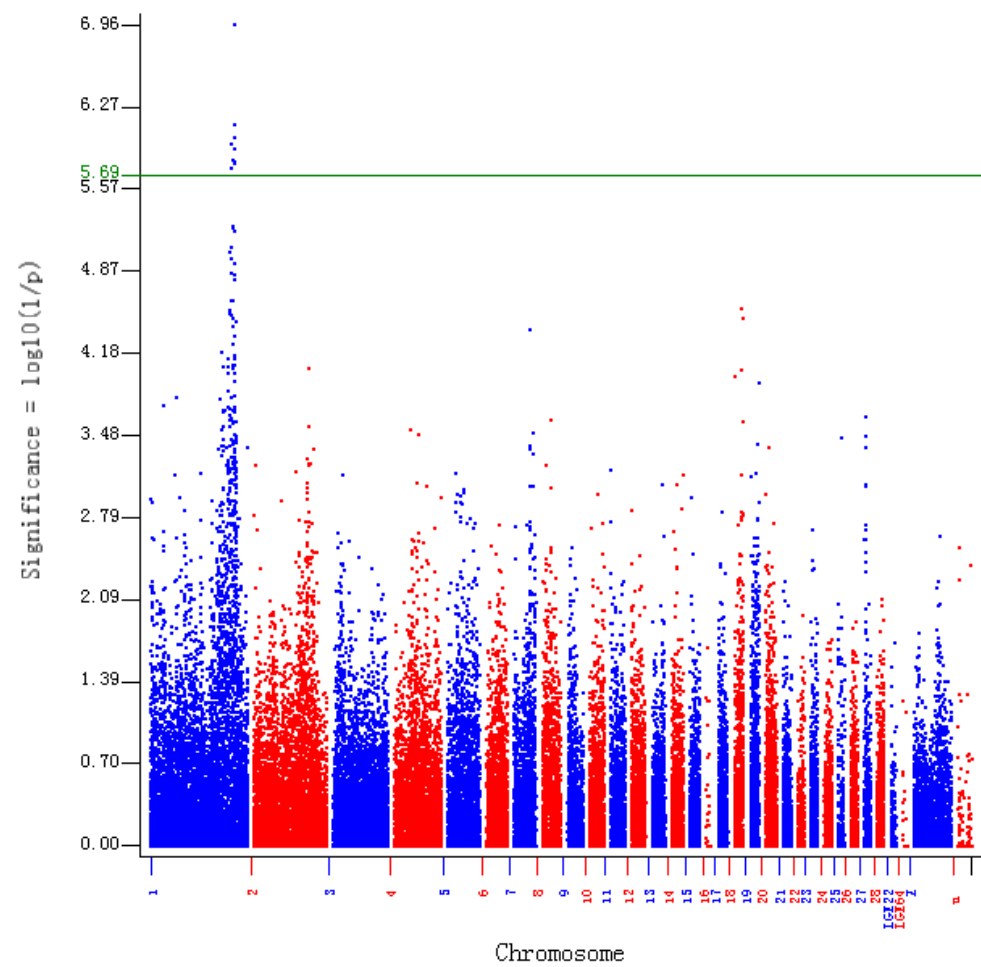**F**

Manhattan Plot: BW35

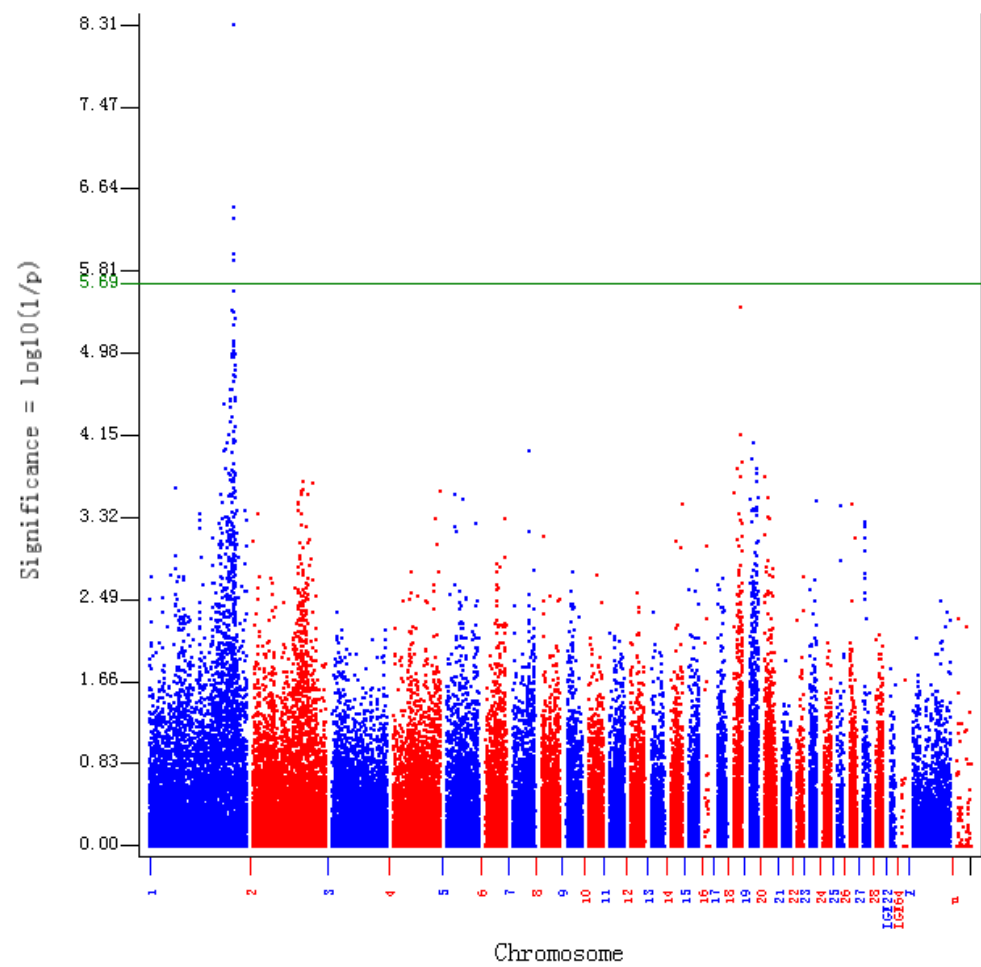

**G**

Manhattan Plot: BW42

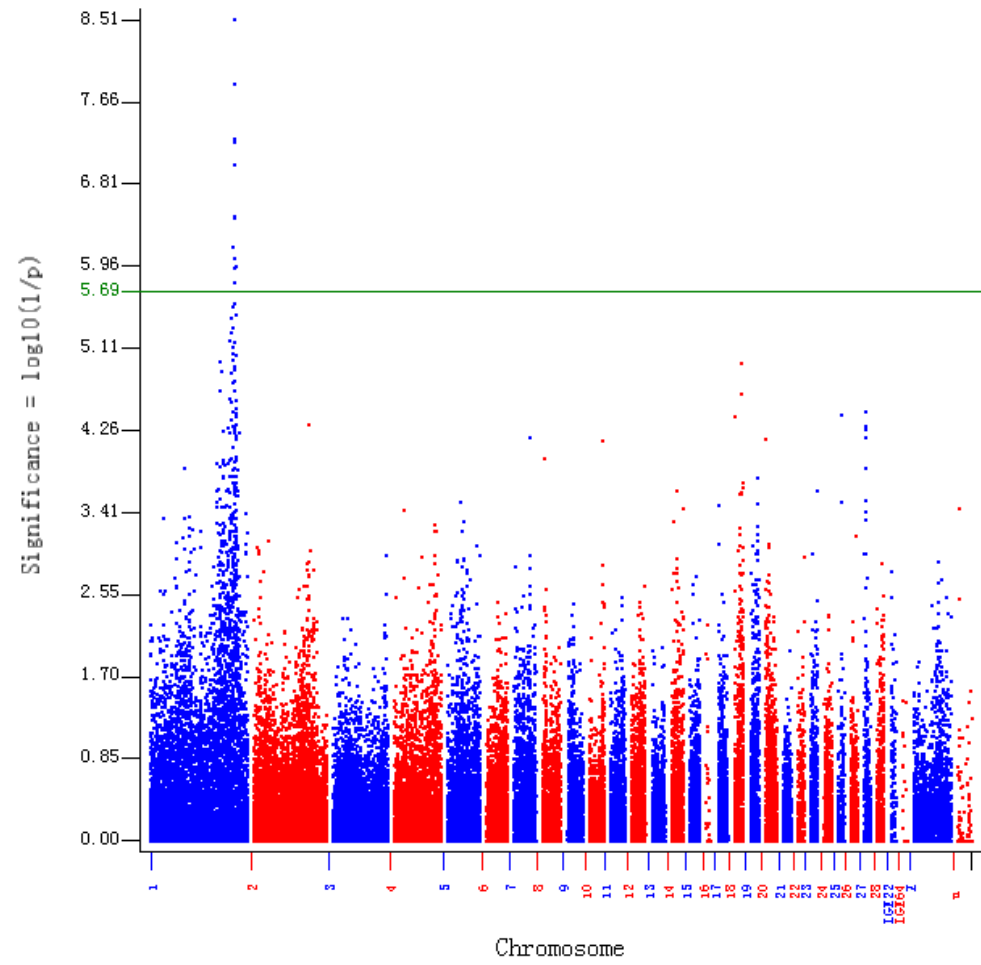**H**

Manhattan Plot: BW49

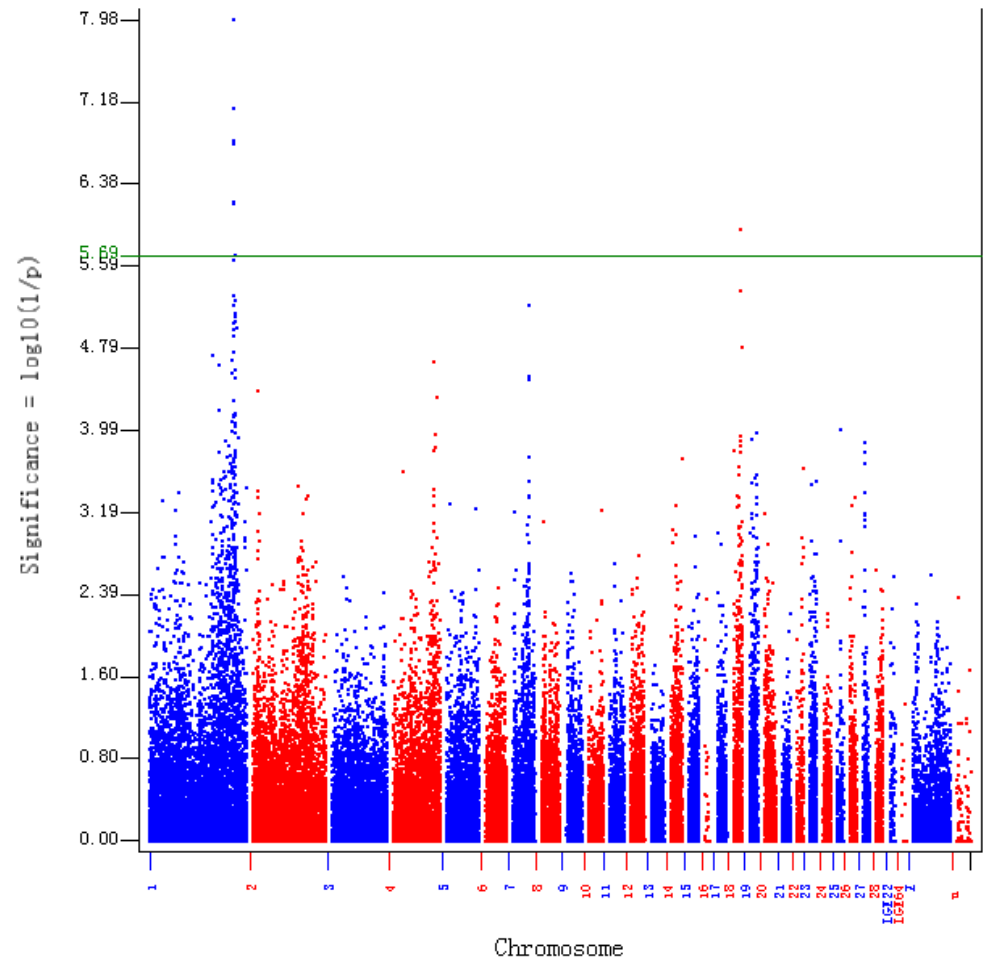

**I**

Manhattan Plot: BW56

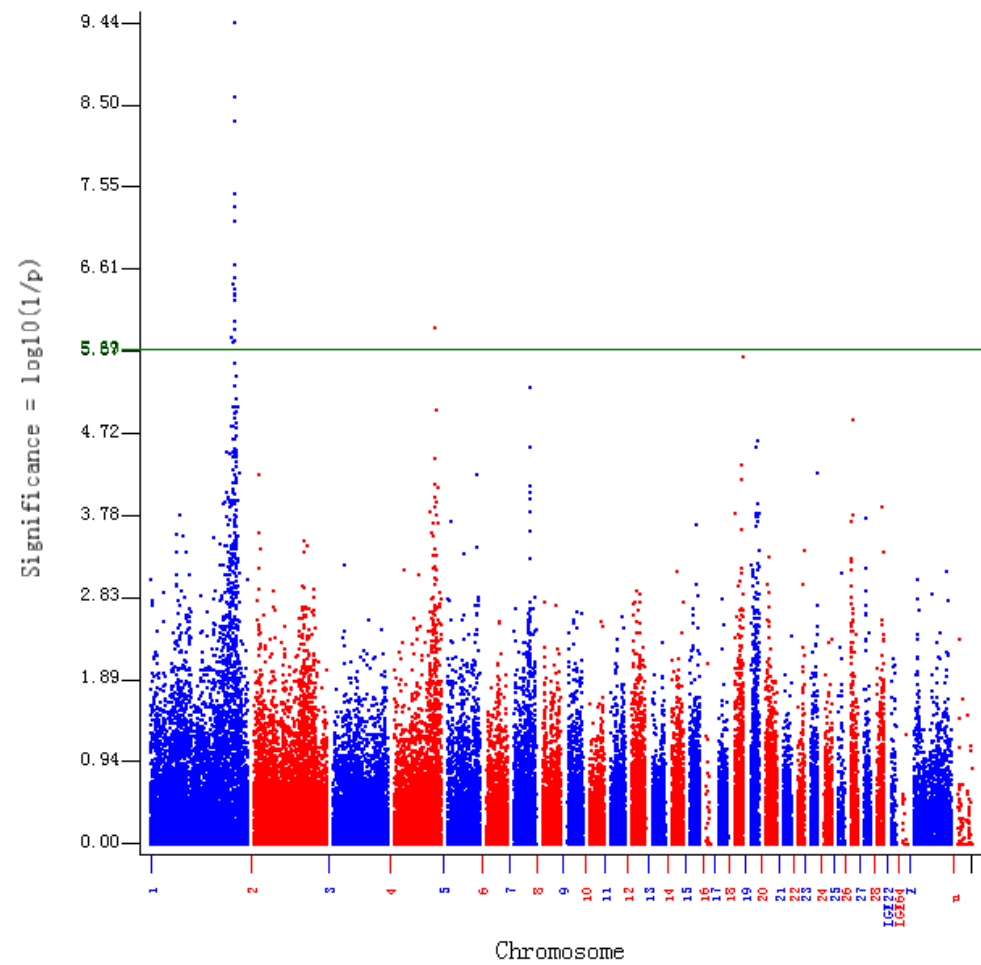**J**

Manhattan Plot: BW63

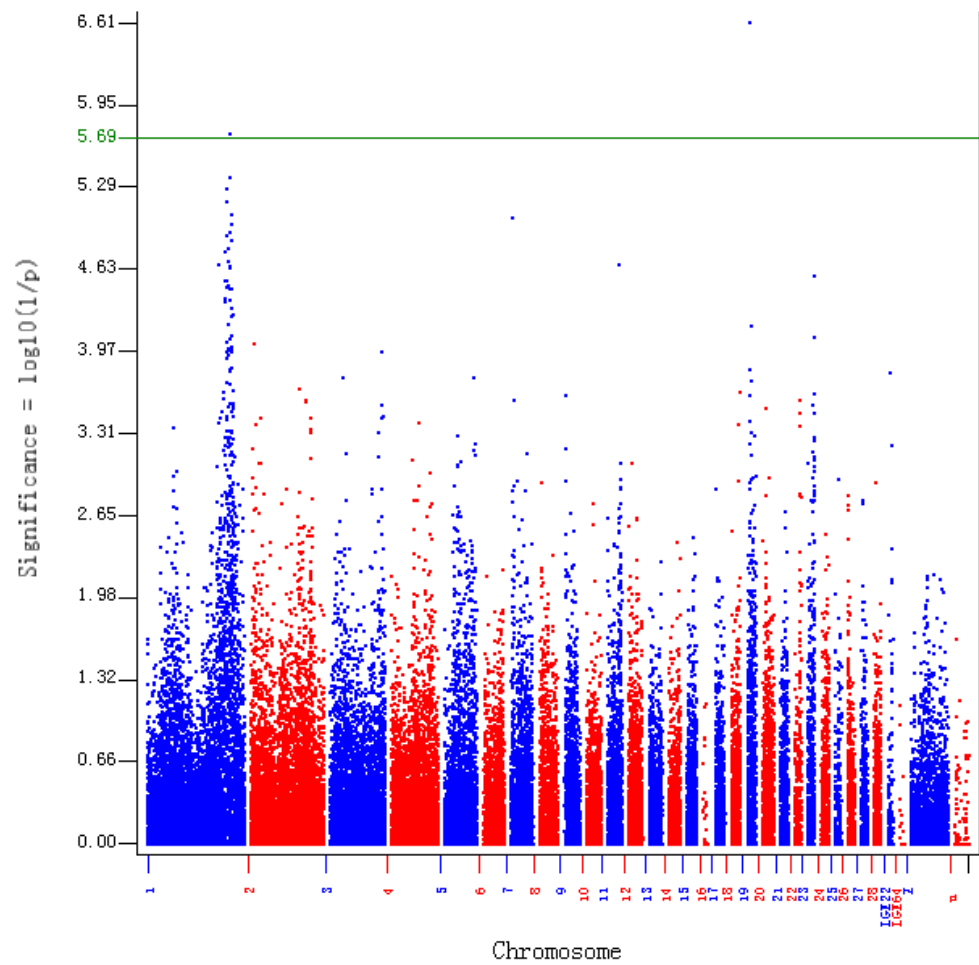

**K**

Manhattan Plot: BW70

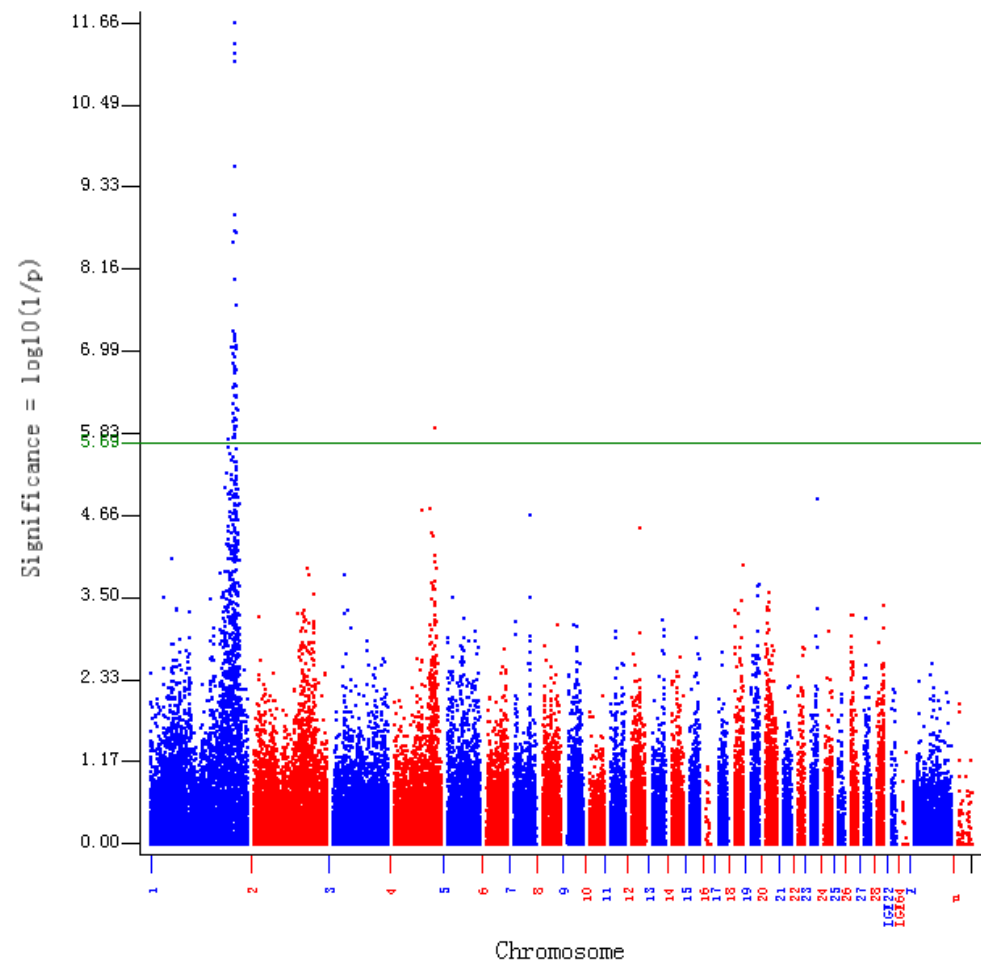**L**

Manhattan Plot: BW77

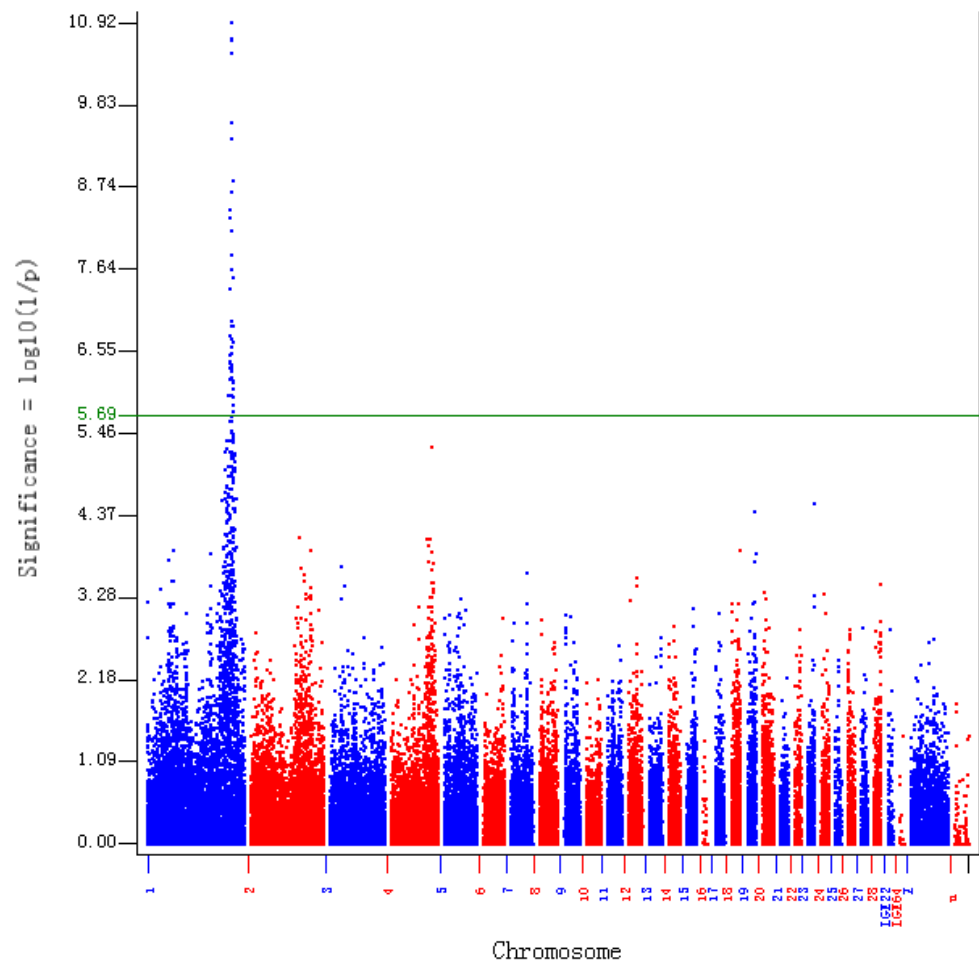

**M**

Manhattan Plot: BW84

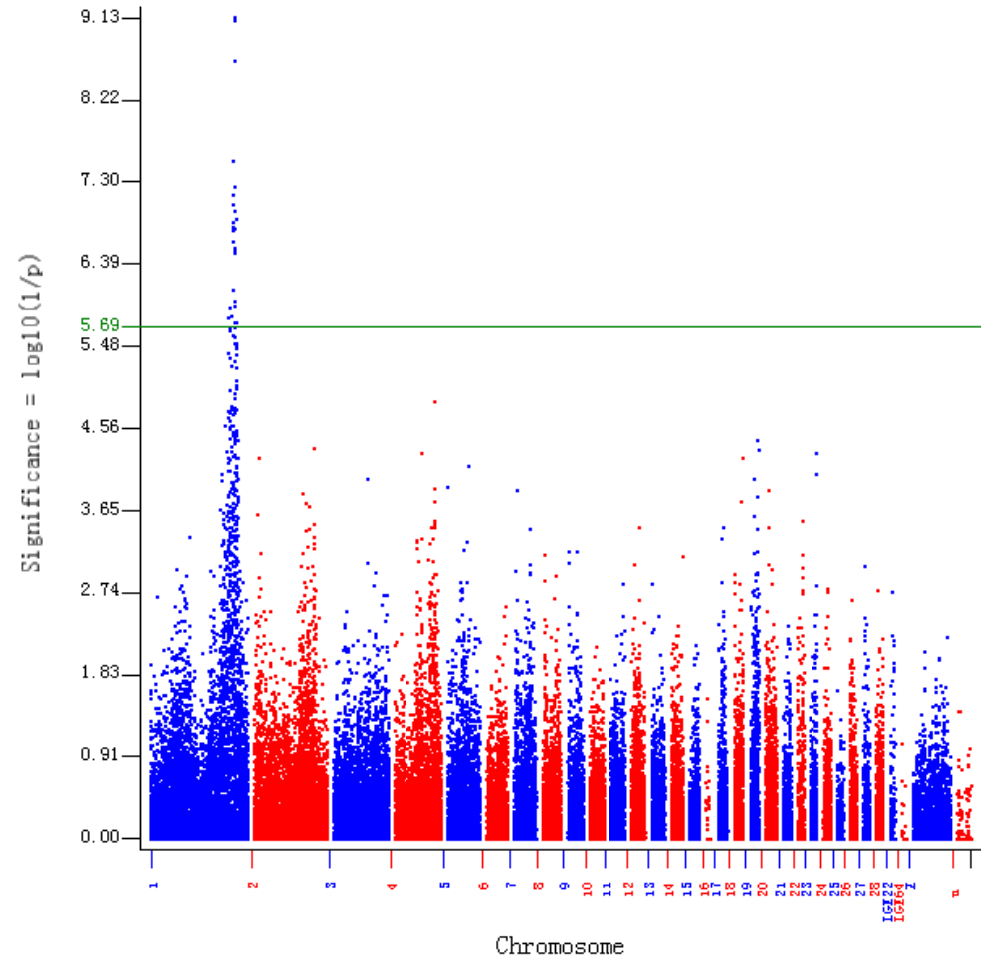**N**

Manhattan Plot: BW90

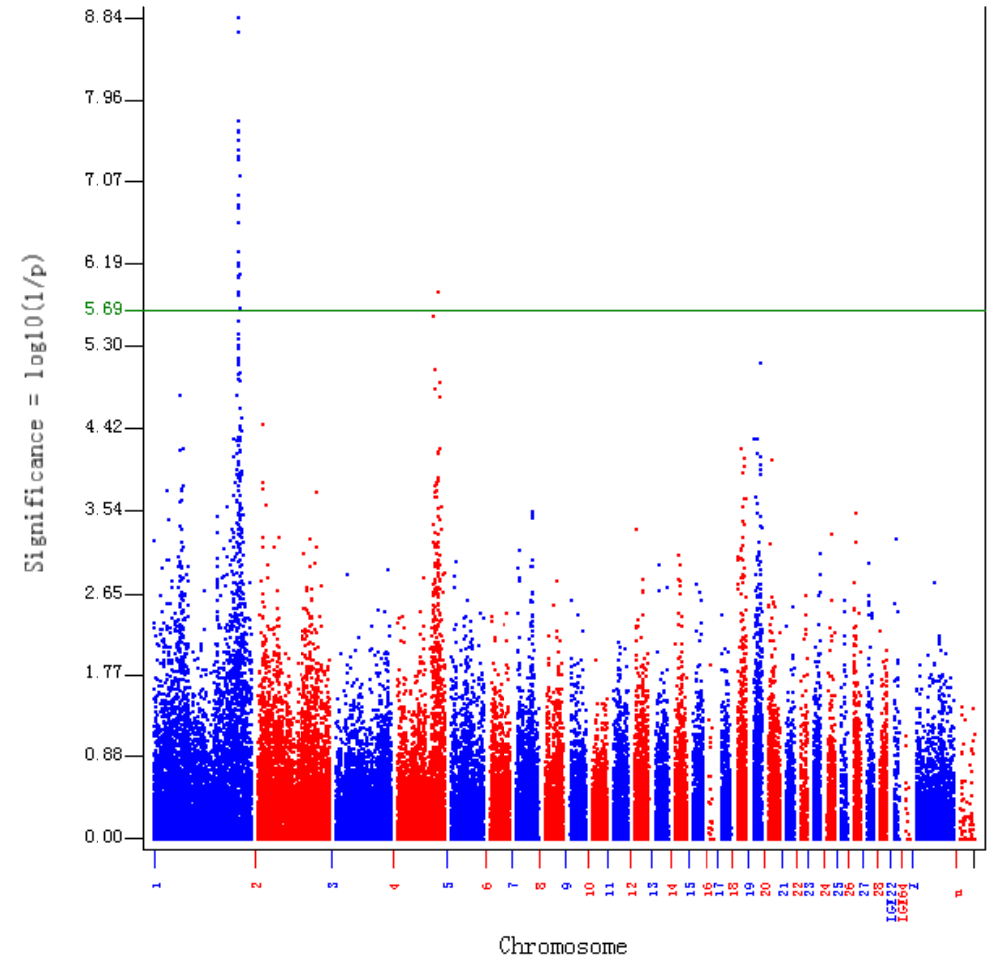

**O**

Manhattan Plot: ADG14

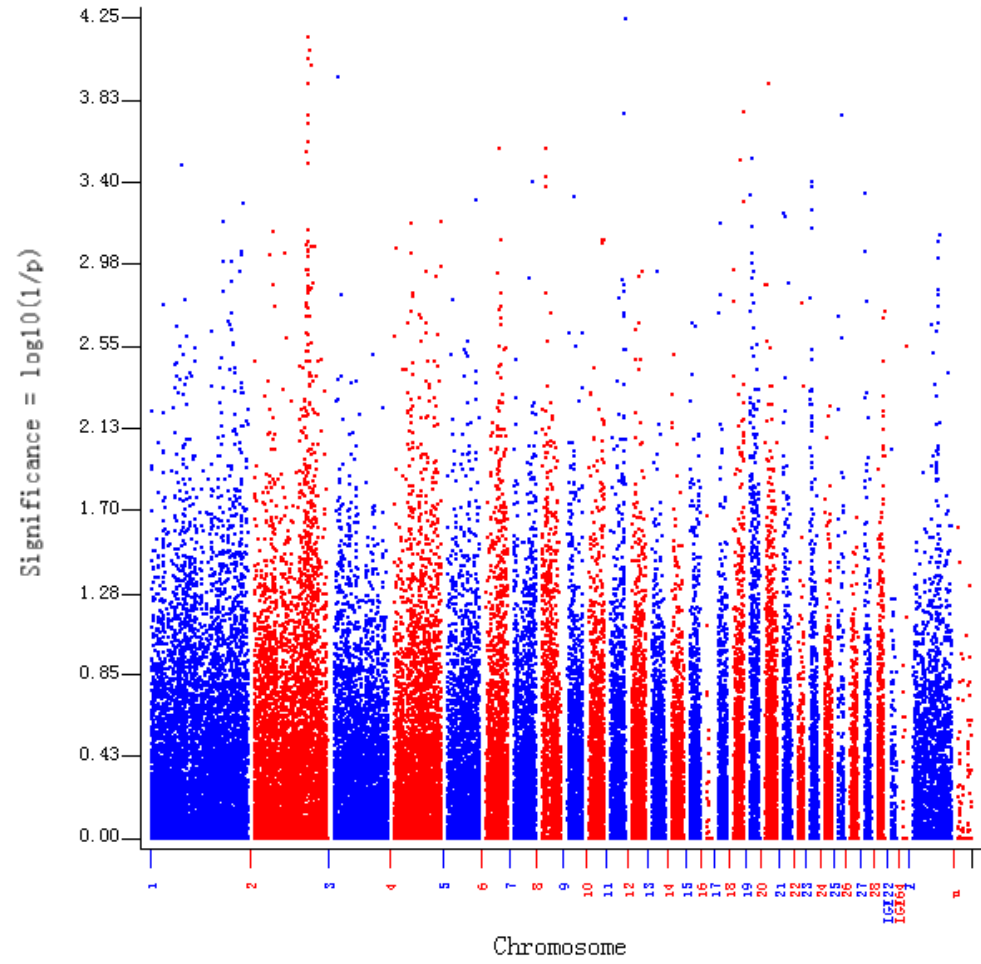**P**

Manhattan Plot: ADG28

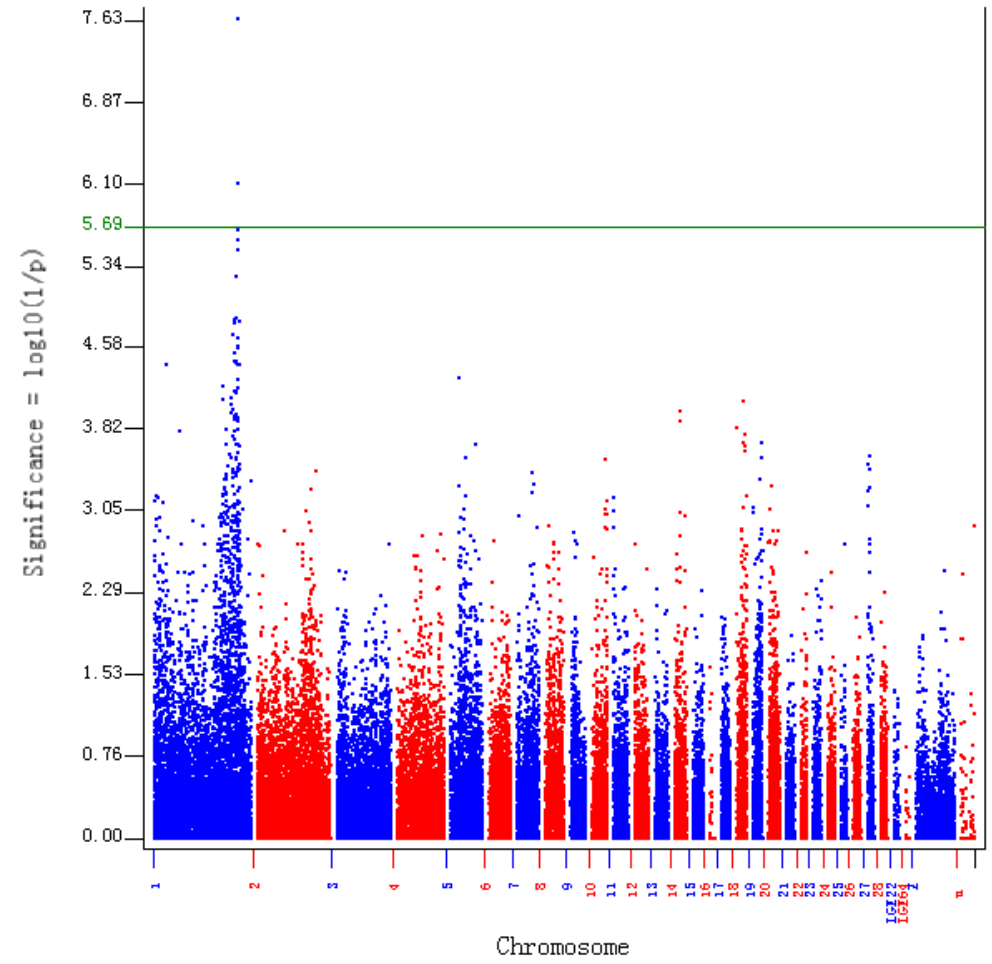



**Q**

Manhattan Plot: ADG42

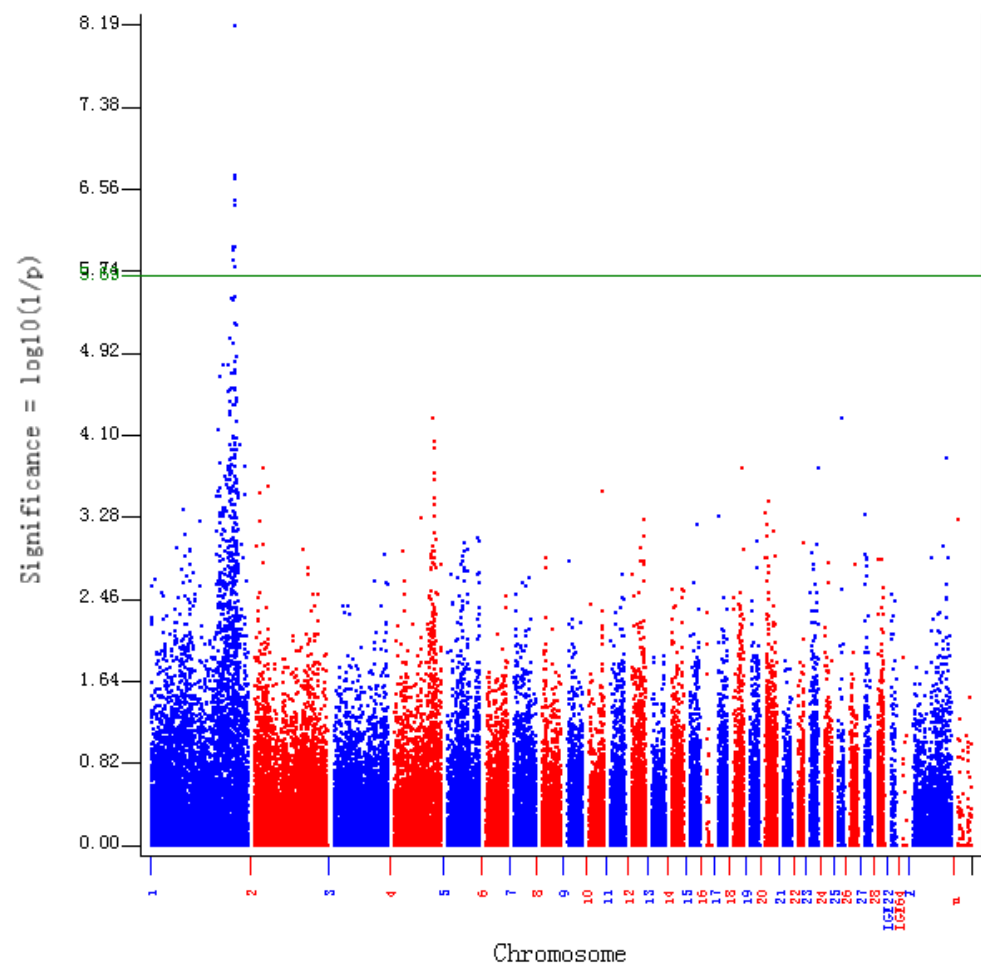**R**

Manhattan Plot: ADG56

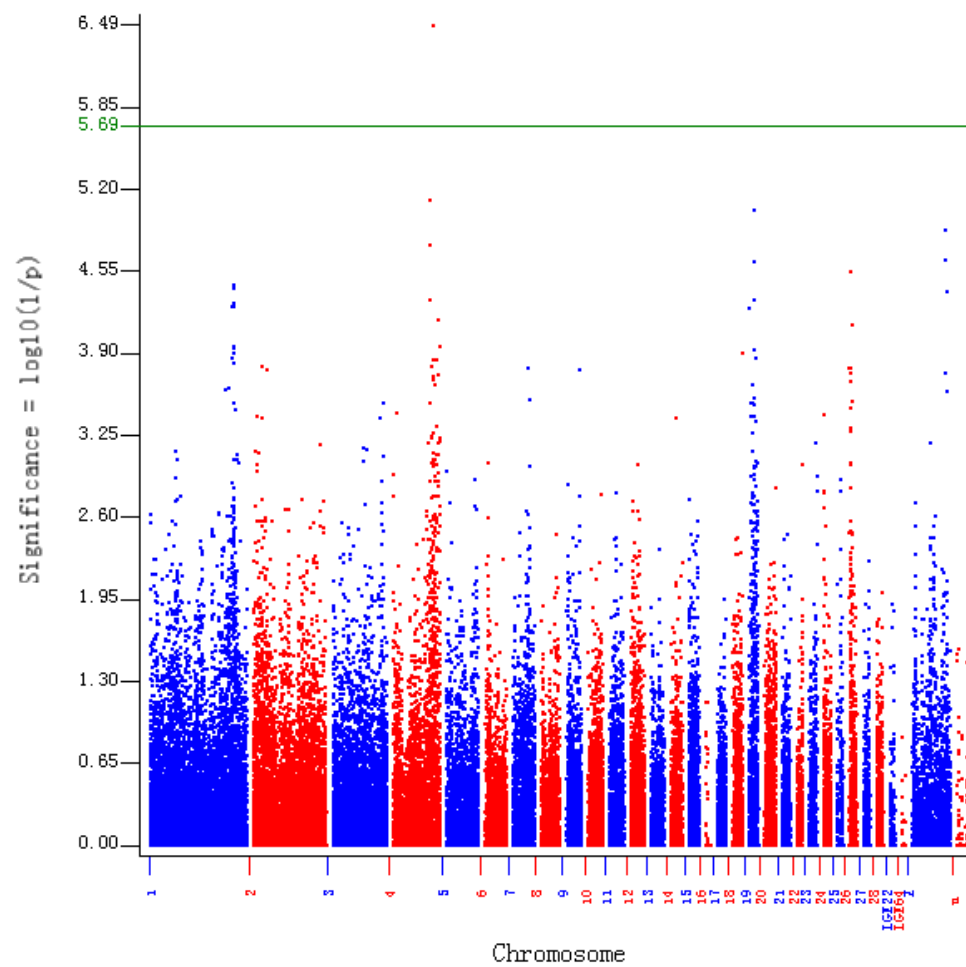

5.69

**S**

Manhattan Plot: ADG70

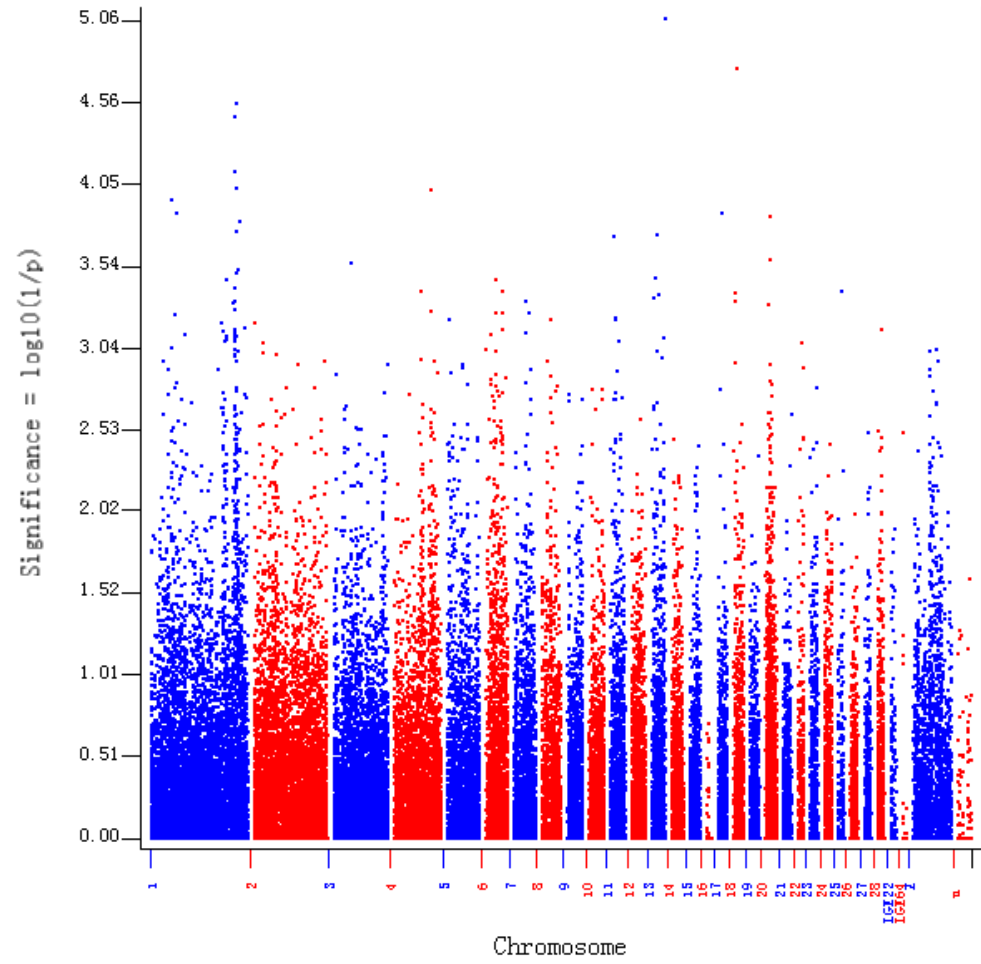

**T**

Manhattan Plot: ADG84

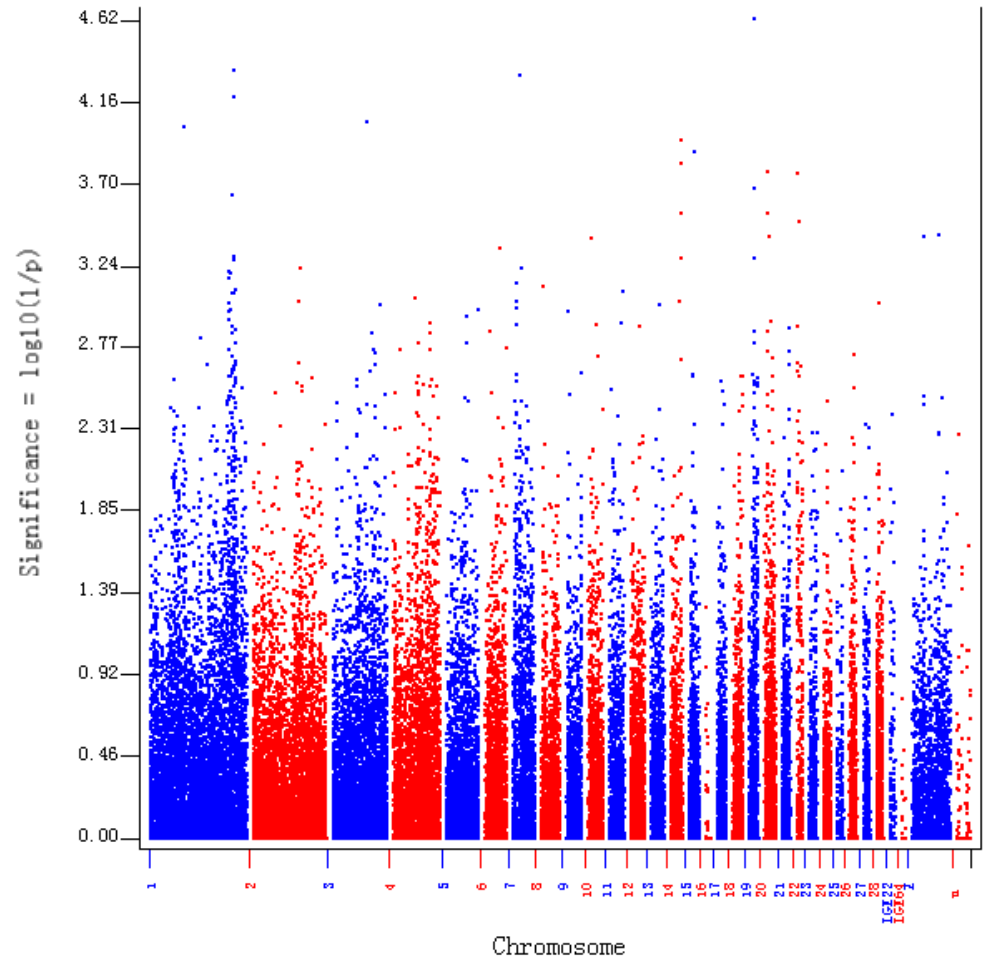

**U**

Manhattan Plot: BMW

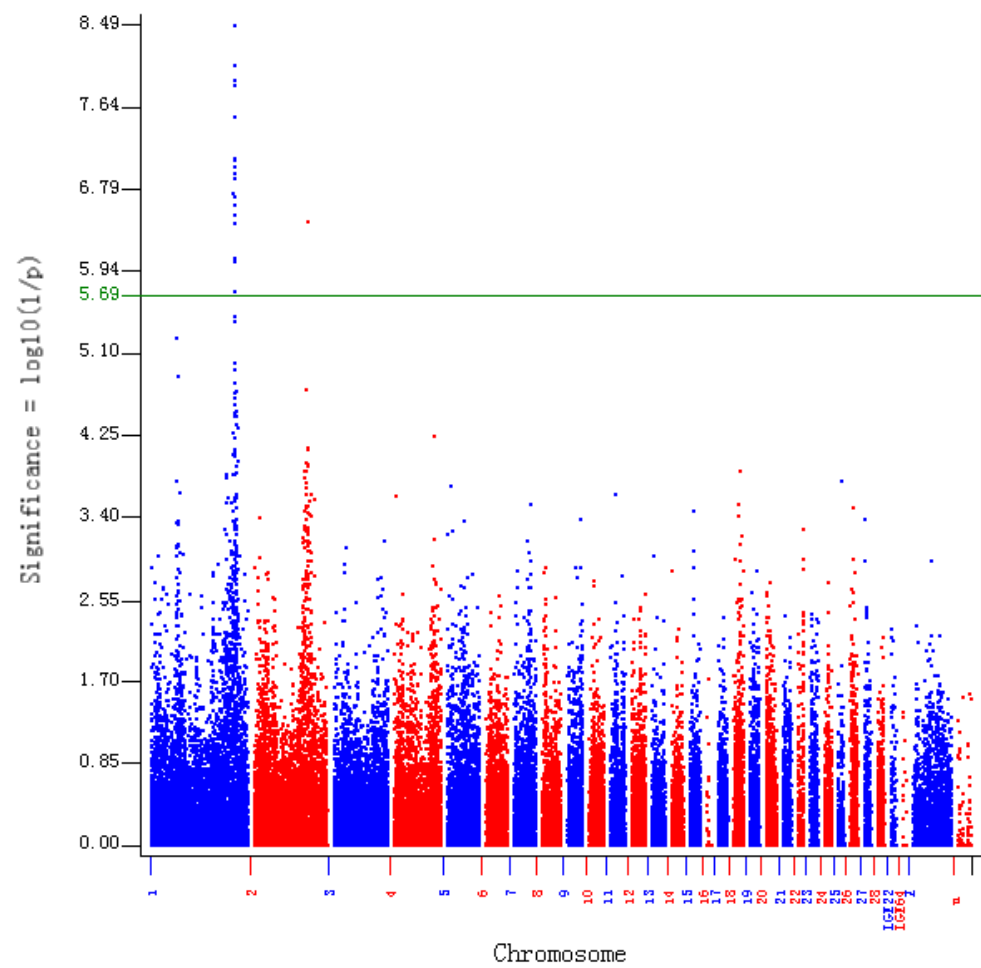**V**

Manhattan Plot: LMW

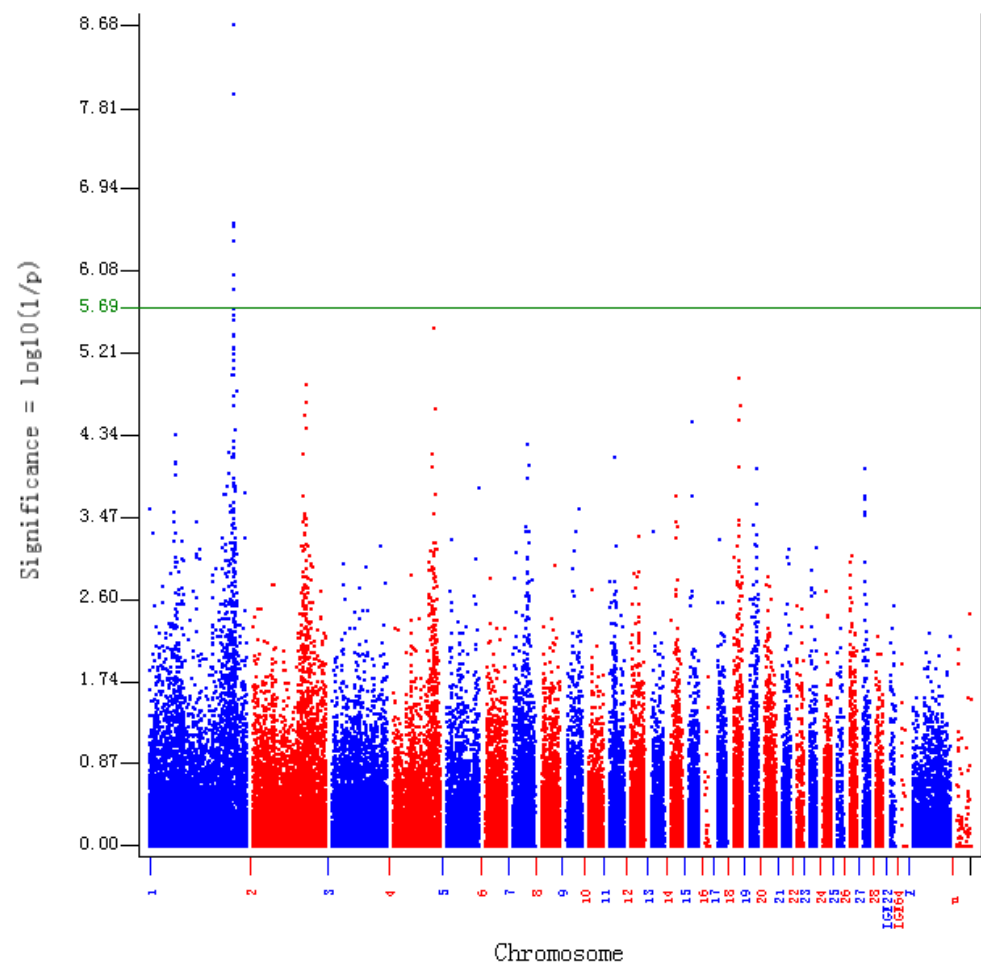

W

Manhattan Plot: WW

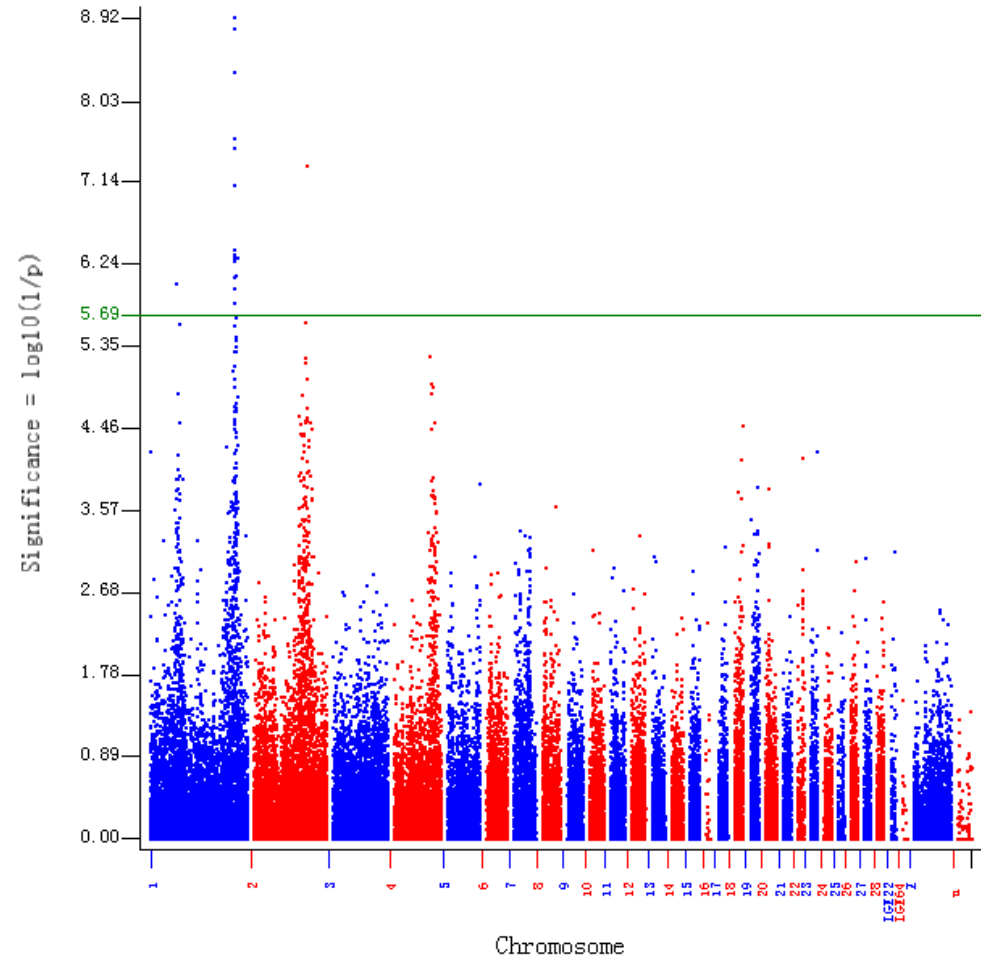

Supplement: pone.0030910.s001.pdf [file pone.0030910.s001.pdf]
