# Supplementary material for: Genome-Wide Association Study Identified a Narrow Chromosome 1 Region Associated with Chicken Growth Traits
Source: PLoS One. 2012 Feb 16;7(2):e30910. doi: 10.1371/journal.pone.0030910 (PMC3281030; doi:10.1371/journal.pone.0030910)
Supplement: Table S2 — Chi-square tests of frequency differences between fast- and slow-growing breeds for SNPs in the 173.5–175 Mb GGA1 region. (XLSX) [file pone.0030910.s003.xlsx]

## Sheet: Sheet1
Table S2. Chi-square tests of frequency differences between fast- and slow-growing breeds for SNPs in the 173.5-175 Mb GGA1 region.
SNP	Position	Nearest Genes	BEH vs. WRR1		BEH vs. WRR		BEH vs. XH		WRR1 vs. WRR		WRR1 vs. XH		WRR vs. XH
			χ2	P	χ2	P	χ2	P	χ2	P	χ2	P	χ2	P
GGaluGA054833	173504098	LOC418866	77.101	0	98.5387	0	0.441789	0.50626	2.1154	0.14592	77.1239	0	100.478	0
rs15497877	173593810	KPNA3	86.7141	0	23.4171	1.30414e-06	6.56396	0.0104065	27.4481	1.61364e-07	56.927	4.51861e-14	6.20832	0.0127152
rs15497910	173613981	KPNA3	0.158259	0.690764	45.3002	1.69028e-11	32.907	9.66757e-09	46.4151	9.56735e-12	32.9992	9.21985e-09	1.25272	0.264006
GGaluGA054930	173841982	35.2 Kb U ENSGALG00000022732	64.5854	8.88178e-16	62.8499	2.22045e-15	0.49401	0.482144	0.0574136	0.810631	63.5247	1.55431e-15	61.5068	4.44089e-15
rs13972304	173931557	20.9 Kb D ENSGALG00000022732	107.153	0	107.929	0	1.05882	0.305293	0	1	142.055	0	142.954	0
GGaluGA054970	173993933	177.5Kb U RNASEH2B	50.3108	1.31228e-12	75.9565	0	0.374035	0.540813	3.70589	0.0542242	49.4007	2.08666e-12	77.2214	0
rs13553164	174027867	RNASEH2B	85.5402	0	123.43	0	4.6225	0.031556	6.14365	0.0131886	73.4787	0	114.203	0
rs14917305	174093115	RNASEH2B	60.7557	6.43929e-15	111.942	0	9.74567	0.00179746	11.9935	0.000533863	118.033	0	184.673	0
GGaluGA055001	174122198	RNASEH2B	17.3094	3.17614e-05	1.39899	0.237522	4.77215	0.0289243	32.2587	1.34948e-08	4.64369	0.0311687	12.9108	0.000326692
rs14917647	174379124	INTS6	47.525	5.43077e-12	107.777	0	0.100271	0.751505	19.1534	1.20622e-05	57.8772	2.78666e-14	127.596	0
rs13553485	174594379	46 bases D ATP7B	79.5601	0	105.673	0	0.0104404	0.918615	9.32248	0.0022636	92.8379	0	122.737	0
GGaluGA055291	174783129	TPTE	19.5577	9.7606e-06	7.87798	0.00500404	14.5359	0.000137513	3.21573	0.0729428	0.456867	0.499092	1.24857	0.264811
rs13973515	174847719	8.9Kb U FOXO1A	120.829	0	87.1817	0	20.9206	4.78725e-06	4.99975	0.0253513	62.2748	2.9976e-15	34.1142	5.19707e-09
GGaluGA055359	174921993	1.9Kb D FOXO1A	117.298	0	70.4464	0	0.215113	0.642789	16.7437	4.27843e-05	143.324	0	88.5284	0
GGaluGA055379	174961349	41.3Kb D FOXO1A	10.9745	0.000923718	23.6881	1.13284e-06	3.53837	0.0599692	2.8871	0.0893088	30.1102	4.08184e-08	50.4161	1.24367e-12
Note: BEH - Bai Er Huang chicken; XH - Xinghua chicken; WRR and WRR1 - two populations of White Recessive Rock.
Fast-growing chicken indicates WRR and WRR1; Slow-growing chicken indicates BEH and XH.
